# Supplementary material for: Genomic resources for a model in adaptation and speciation research: characterization of the Poecilia mexicana transcriptome
Source: BMC Genomics. 2012 Nov 21;13:652. doi: 10.1186/1471-2164-13-652 (PMC3585874; doi:10.1186/1471-2164-13-652)
Supplement: Additional file 2: Table S1 — Transcripts for RT-PCR validation and corresponding primers. [file 1471-2164-13-652-S2.xlsx]

## Sheet: Sheet1
Contig ID	Gene description	PrimerID	Region	Primers	Tm (°C)	Primer Length	Product Size
comp2624_c0_seq1	Thiosulfate sulfurtransferase (Rhodanese)	L3_outF	out	F: 5'-CACAGCTCATTTTCACAGTTTCGC-3'	70	33	565
		L3_outR	out	R: 5'-CACTCCAGTAATTTCACATAGACAG-3'	68	34
		L3_inF	in	F: 5'-TTCGCCCTTTGACCAGGATG-3'	62	29	492
		L3_inR	in	R: 5'-GTTAATTTATTGTGCGTTATGACTTC-3'	68	35
comp25579_c0_seq1	Sulfite oxidase	L4_outF	out	F: 5'-TCAATGCAATGCTGCTTCTCAG-3'	64	31	929
		L4_outR	out	R: 5'-AGCCAATAGCACGTCTCTGAG-3'	64	30
		L4_inF	in	F: 5'-TGACTCGACTTCAAAGGCATCA-3'	64	31	859
		L4_inR	in	R: 5'-CATTTGGCGTTCCCAATAGCAG-3'	66	31
comp11493_c0_seq1	Malate dehydrogenase	L5_outF	out	F: 5'-GTGACCACATGAGGGACATCTG-3'	66	31	628
		L5_outR	out	R: 5'-CACCAGATACAGTGTTTCATGAC-3'	66	32
		L5_inF	in	F: 5'-ACCCCAGAGGGTGAATTCACC-3'	66	30	568
		L5_inR	in	R: 5'-ATCACTGACAATATGTAAAGAGTC-3'	64	33
comp3837_c0_seq1	Catalase	L6_outF	out	F: 5'-AGGTAAACAGATAACGATTTTCTCC-3'	68	34	1944
		L6_outR	out	R: 5'-GAAAAGGTTCATCAATTATTGTTGG-3'	66	34
		L6_inF	in	F: 5'-GACGTGCGGTTTGTCGAGATG-3'	66	30	1865
		L6_inR	in	R: 5'-TTAACTGAATCAAACTGAATCAGC-3'	64	33
comp436_c1_seq1	Hypoxia-inducible_factor_1a	L1_out_F	out	F: 5'-CCGATGGACGCCTTCTTTCCC-3'	68	30	948
		L1_out_R	out	R: 5'-CTGCAGCAGCTCCTCCGGTTT-3'	68	30
		L1_in_F	in	F: 5'-GTTGGCGGGCTTCGTCATGG-3'	66	29	901
		L1_in_R	in	R: 5'-CTCCGTCAGCCCCAGGAGGA-3'	68	29
comp7828_c0_seq1	Hsc71	L2_outF	out	F: 5'-GAGTGCTGGAGAGGAGCTCAA-3'	66	30	552
		L2_outR	out	F: 5'-GAGTCATTGAAGTAAGCAGGAAC-3'	66	32
		L2_inF	in	R: 5'-ATGTCTAAAGGACCAGCAGTAG-3'	64	31	427
		L2_inR	in	R: 5'-CTGCATTGTTCACAGGCTTGC-3'	64	30
